# Supplementary material for: Plasma Fibrin Clot Properties Are Unfavorably Altered in Women following Venous Thromboembolism Associated with Combined Hormonal Contraception
Source: Hindawi journal article supplement (doi:10.1155/2019/4923535), 2019-11-18
Supplement: f1 [file 4923535.f1.pdf]

## Supplementary Material

**Table S1. Correlation coefficients for the permeability coefficient ( $K_s$ ), maximum D-dimer levels in the lysis assay ( $D-D_{max}$ ) and maximum rate of increase in D-dimer levels in the lysis assay ( $D-D_{rate}$ ).**

|                                  | $K_s$ | $D-D_{max}$ | $D-D_{rate}$ |
|----------------------------------|-------|-------------|--------------|
| <b>Contraception-related VTE</b> |       |             |              |
| Fibrinogen                       | -0.49 | 0.67        | -0.45        |
| Lag pahse                        | 0.55  | -0.38       | NC           |
| $\Delta Ab_{S_{max}}$            | -0.69 | 0.63        | -0.52        |
| <b>Unprovoked VTE</b>            |       |             |              |
| Fibrinogen                       | -0.54 | 0.52        | NC           |
| Lag pahse                        | NC    | -0.40       | NC           |
| $\Delta Ab_{S_{max}}$            | -0.41 | 0.45        | NC           |
| <b>Controls</b>                  |       |             |              |
| Fibrinogen                       | -0.64 | 0.68        | NC           |

|                                 |       |       |    |
|---------------------------------|-------|-------|----|
| Lag pahse                       | NC    | NC    | NC |
| $\Delta\text{Abs}_{\text{max}}$ | -0.52 | -0.43 | NC |

---

Abbreviations:  $\Delta\text{Abs}_{\text{max}}$ , maximum absorbance at the plateau phase; CLT, clot lysis time; D-D<sub>max</sub>, maximum D-dimer levels in the lysis assay; D-D<sub>rate</sub>, maximum rate of increase in D-dimer levels in the lysis assay; K<sub>s</sub>, fibrin clot permeability coefficient; NC indicates nonsignificant correlation.
